# Supplementary material
Source: HighWire-hosted journal article supplement (https://jnm.snmjournals.org/highwire/filestream/108202/field_highwire_adjunct_files/0/262773_Supplemental_Data.pdf)
Supplement: 262773_Supplemental_Data.pdf [file 262773_Supplemental_Data.pdf]

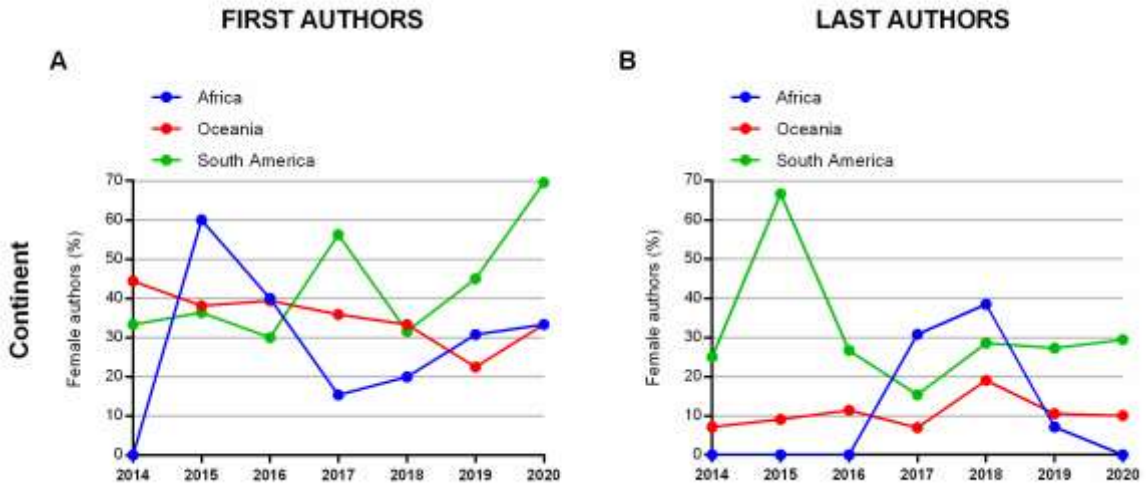

**Supplemental Figure 1.** Percentage of female first (A) and last (B) authorship from 2014 to 2020 for Africa, Oceania and South America.
